# Supplementary material
Source: ML conference proceedings conference paper supplement (https://openaccess.thecvf.com/content/CVPR2024/html/Mazur_SuperPrimitive_Scene_Reconstruction_CVPR_2024_paper.html)
Supplement: Supplementary file 2 [file Mazur_SuperPrimitive_Scene_Reconstruction_CVPR_2024_supplemental.zip]

Archive with 4 entries (4 files):
- supplementary.pdf
- __MACOSX/._supplementary.pdf
- video.mp4
- __MACOSX/._video.mp4
